# Supplementary material for: Response Surface Modeling and Optimization of the Extraction of Phenolic Antioxidants from Olive Mill Pomace
Source: MDPI journal article supplement (doi:10.3390/molecules27238620), 2022-12-06
Supplement: s1 [file s1]

## Supplementary Material S1

# Response surface modeling and optimization of the extraction of phenolic antioxidants from olive mill pomace

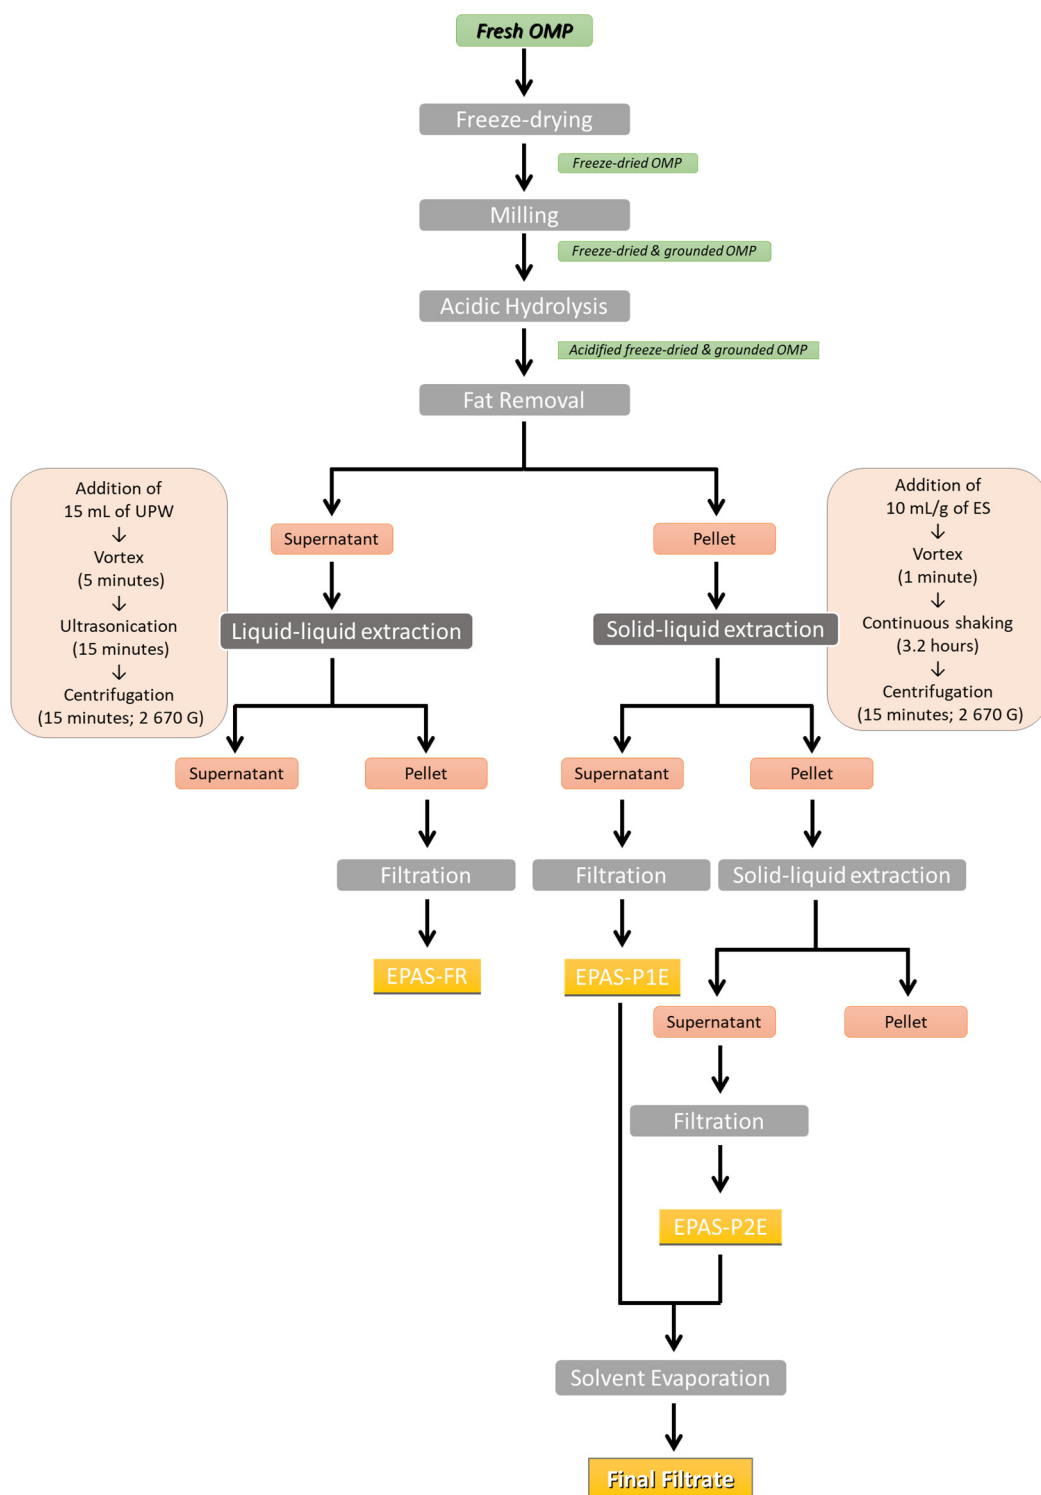

**Figure S1.** Optimized two-step solvent extraction for the recovery of phenolic antioxidants from olive mill pomace samples (ES – Extraction Solvent; OMP – Olive Mill Pomace; EPAS-FR – Extracted Phenolic Antioxidants during the Fat Removal procedure; EPAS-P1E – Extracted Phenolic Antioxidants during the primary extraction; EPAS-P2E – Extracted Phenolic Antioxidants from the secondary extraction procedure; UPW – Ultrapure water).
